# Supplementary material for: Species-Specific Paternal Age Effects and Sperm Methylation Levels of Developmentally Important Genes
Source: MDPI journal article supplement (doi:10.3390/cells11040731), 2022-02-19
Supplement: s1 [file s1]

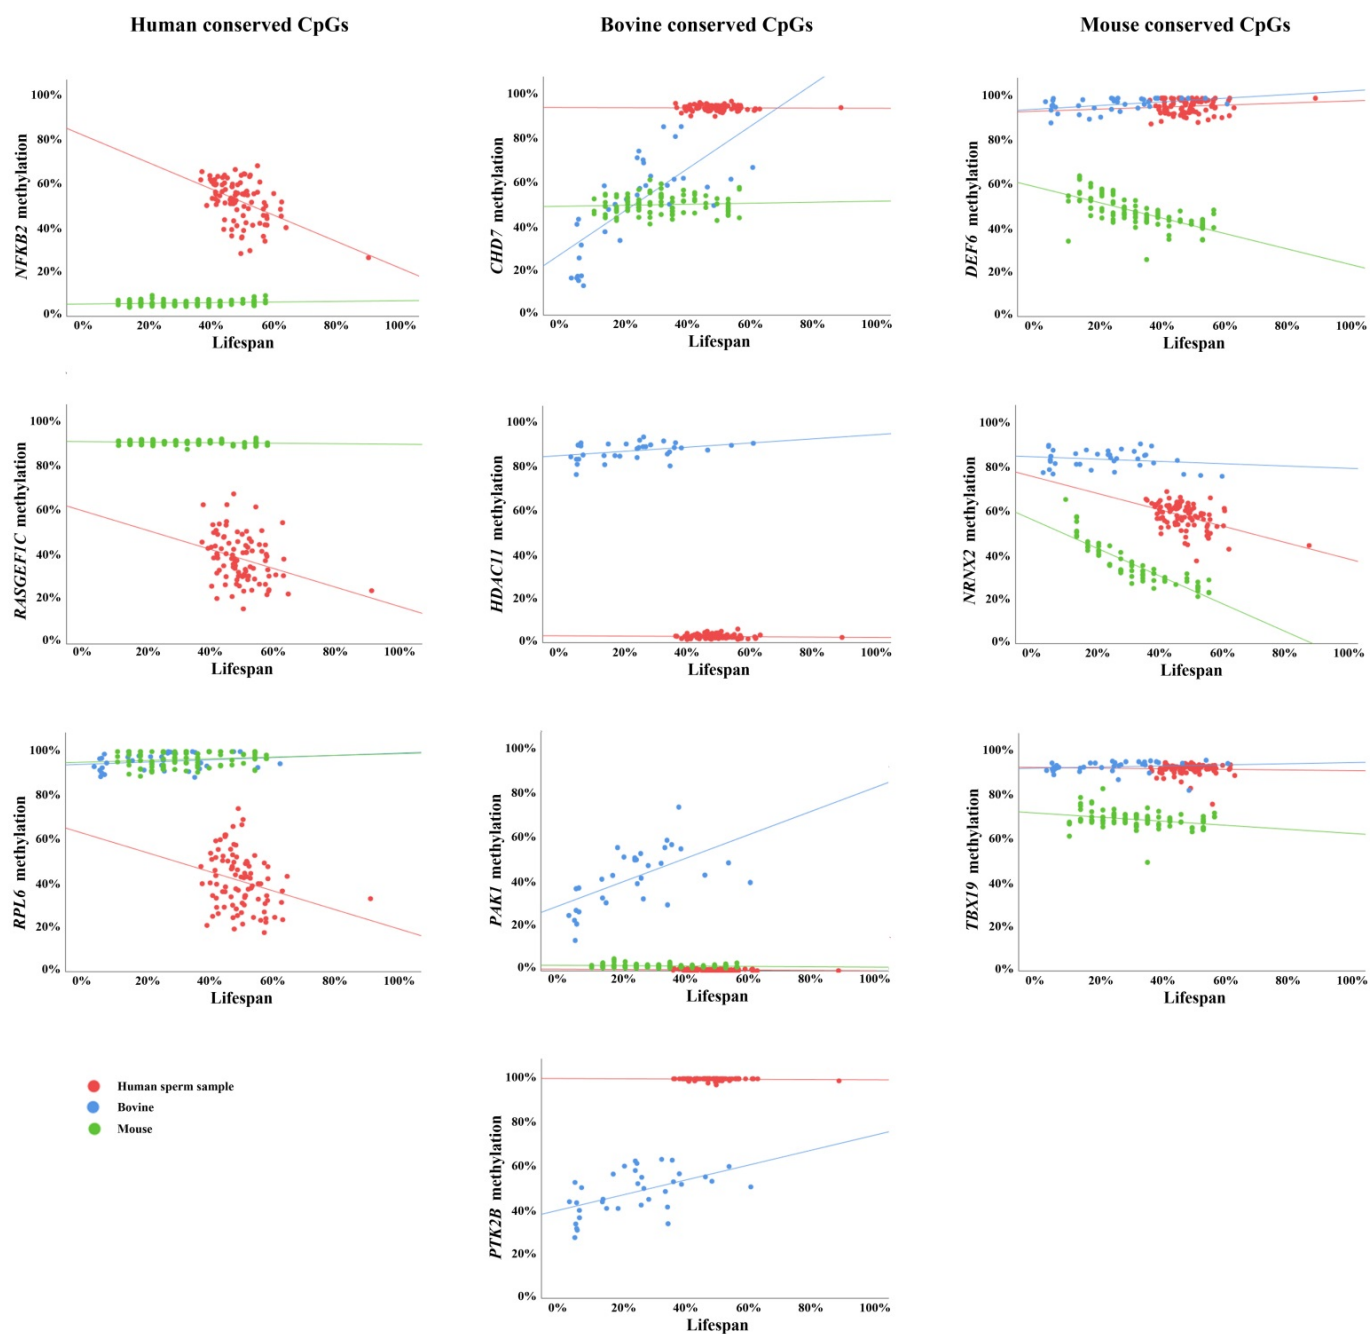

**Figure S1.** Scatter plots showing the correlations between methylation (y-axis in %) of individual evolutionarily conserved CpGs (see Table below) and donor age (x-axis in percentage of lifespan) in 94 human sperm samples (indicated by red dots), 36 bovine samples (blue dots), and 94 mouse samples (green dots).

| Gene            | Genomic localization of the analyzed evolutionarily conserved CpG sites <sup>a</sup> |                   |                   |
|-----------------|--------------------------------------------------------------------------------------|-------------------|-------------------|
|                 | HSA                                                                                  | BTA               | MMU               |
| <i>NFKB2</i>    | chr10: 102,398,797                                                                   | n.d.              | chr19: 46,308,688 |
| <i>RASGEF1C</i> | chr5: 180,128,418                                                                    | n.d.              | chr11: 49,960,589 |
| <i>RPL6</i>     | chr12: 112,408,247                                                                   | chr17: 61,838,769 | chr5: 121,205,847 |
| <i>CHD7</i>     | chr8: 60,742,015                                                                     | chr14: 26,361,261 | chr4: 8,752,069   |
| <i>HDAC11</i>   | chr3: 13,481,297                                                                     | chr22: 58,440,704 | n.d.              |
| <i>PAK1</i>     | chr11: 77,411,819                                                                    | chr29: 18,586,641 | chr7: 97,843,091  |
| <i>PTK2B</i>    | chr8: 27,397,612                                                                     | chr8: 74,491,017  | n.d.              |
| <i>DEF6</i>     | chr6: 35,309,739                                                                     | chr23: 9,282,385  | chr17: 28,217,034 |
| <i>NRXN2</i>    | chr11: 64,636,329                                                                    | chr29: 42,885,109 | chr19: 6,504,094  |
| <i>TBX19</i>    | chr1: 168,291,254                                                                    | chr3: 253,081     | chr1: 165,153,631 |

<sup>a</sup> Genome Reference Consortium Human Build 38 (GRCh38)/hg38, ARS-UCD1.2/bosTau9, and Genome Reference Consortium Mouse Build 38 (GRCm38)/mm10 were used as references.

**Table S1.** Genes with age-related differentially methylated regions, identified by RRBS in human, bovine, and mouse sperm samples.

| Gene            | RRBS           | Genomic location <sup>a</sup>         | Average Methylation | Differential Methylation | Gene region       | Gene function                                                                                                                                               |
|-----------------|----------------|---------------------------------------|---------------------|--------------------------|-------------------|-------------------------------------------------------------------------------------------------------------------------------------------------------------|
| <i>NFKB2</i>    | Human ageDMRs  | HSA10:<br>102,398,797–<br>102,398,849 | 44%                 | -1.2%                    | Promoter          | Subunit of the transcription factor complex NFκB; central activator of genes involved in inflammation and immune functions.                                 |
| <i>RASGEF1C</i> |                | HSA5:<br>180,128,402–<br>180,128,452  | 58%                 | -1.0%                    | CTCF binding      | Guanine-nucleotide releasing factor, involved in small GTPase mediated signal transduction.                                                                 |
| <i>RPL6</i>     |                | HSA12:<br>112,408,247–<br>112,408,263 | 58%                 | -1.4%                    | Promoter          | Component of the 60S ribosomal subunit, participating in ribosome assembling; ribosome-independent functions in DNA damage response and immunosurveillance. |
| <i>CHD7</i>     | Bovine ageDMRs | BTA14:<br>26,361,261–<br>26,361,323   | 55%                 | 8.5%                     | Promoter          | Transcriptional regulator that contains several helicase family domains; associated with CHARGE syndrome.                                                   |
| <i>HDAC11</i>   |                | BTA22:<br>58,440,641–<br>58,440,645   | 93%                 | 2.4%                     | Promoter          | Class IV histone deacetylase; involved in epigenetic repression and transcriptional regulation.                                                             |
| <i>PAK1</i>     |                | BTA29:<br>18,586,586–<br>18,586,667   | 52%                 | 6.6%                     | Promoter          | Member of serine/threonine-protein kinase family; involved in intracellular nuclear signaling pathways, cytoskeleton reorganization and cell adhesion.      |
| <i>PTK2B</i>    |                | BTA8:<br>74,490,924–<br>74,490,972    | 66%                 | 4.0%                     | Promoter          | Cytoplasmic protein tyrosine kinase; participates in calcium-dependent regulation of ion channels; activates MAP kinase signaling.                          |
| <i>DEF6</i>     | Mouse ageDMRs  | MMU17:<br>28,217,012–<br>28,217,035   | 34%                 | -16.2%                   | Promoter          | Candidate gene for schizophrenia.                                                                                                                           |
| <i>NRXN2</i>    |                | MMU19:<br>6,503,984–<br>6,504,132     | 58%                 | -21.5%                   | Protein coding    | Member of the neurexin gene family; functions as a cell adhesion molecule and receptor in the vertebrate nervous system.                                    |
| <i>TBX19</i>    |                | MMU1:<br>165,153,599–<br>165,153,641  | 68%                 | -3.6%                    | Promoter flanking | Member of a transcription factor family that share a common DNA-binding domain (T box) and regulate the expression of pituitary POMC.                       |

<sup>a</sup> Genome Reference Consortium Human Build 38 (GRCh38)/hg38, ARS-UCD1.2/bosTau9, and Genome Reference Consortium Mouse Build 38 (GRCm38)/mm10 were used as references.

**Table S2.** PCR and sequencing primers for bisulfite pyrosequencing in human, bovine, and mouse sperm.

| Gene                   | Primer     | Sequence (5'-3') <sup>a</sup>   | Location <sup>b</sup>                   | No. of CpGs | Annealing Temp. (°C) |
|------------------------|------------|---------------------------------|-----------------------------------------|-------------|----------------------|
| Human ageDMRs          |            |                                 |                                         |             |                      |
| HSA<br><i>NFKB2</i>    | Forward    | GGAGGAAGGTTTTGTTTATTTTTTTTTTAGT | HSA<br>chr10: 102,398,763 – 102,398,895 |             | 60                   |
|                        | Reverse    | *TTTACCCCTCCCTCCATCAATAC        |                                         |             |                      |
|                        | Sequencing | AGGTTTTGTTTATTTTTTTTTTAGTT      |                                         | 3           |                      |
| MMU<br><i>Nfkb2</i>    | Forward    | TTTtagataAGGAGGAAGTGTAGAG       | MMU<br>chr19: 46,308,623 – 46,308,783   |             | 60                   |
|                        | Reverse    | *CCTTCTCCCTACCACTTACA           |                                         |             |                      |
|                        | Sequencing | AGGTTTTGTTTATTTTTTTTTTAGTT      |                                         | 4           |                      |
|                        |            |                                 |                                         |             |                      |
| HSA<br><i>RASGEF1C</i> | Forward    | GGGAGGGTATAGTGTATTTGTGT         | HSA<br>chr5: 180,128,340 – 180,128,486  |             | 62                   |
|                        | Reverse    | *CCTCCATCCACAAAAAACTCCTTAAT     |                                         |             |                      |
|                        | Sequencing | GGTGAGGAAGGTGGT                 |                                         | 3           |                      |
| MMU<br><i>Rasgef1c</i> | Forward    | GGAGTTTTTGGGTGTTTGTAGTG         | MMU<br>chr11: 49,960,535 – 49,960,620   |             | 60                   |
|                        | Reverse    | *TCTTTCCTAAATCCCACTCAC          |                                         |             |                      |
|                        | Sequencing | GGTGTTTGTAGTGATTTT              |                                         | 2           |                      |
|                        |            |                                 |                                         |             |                      |
| HSA<br><i>RPL6</i>     | Forward    | GTAATTGTTATAAAATTAGTTGGTGGTGA   | HSA<br>chr12: 112,408,214 – 112,408,308 |             | 60                   |
|                        | Reverse    | *TCCAATTTACAATCCCCACATC         |                                         |             |                      |
|                        | Sequencing | AGTTGGTGGTGATAAGAA              |                                         | 4           |                      |
| BTA<br><i>RPL6</i>     | Forward    | AGTTGGTGGAGATAAGAATGG           | BTA<br>chr17: 61,838,741 – 61,838,919   |             | 60                   |
|                        | Reverse    | *TAAACCCCAAACCTCACTATCCT        |                                         |             |                      |
|                        | Sequencing | AGATAAGAATGGTGGTAT              |                                         | 2           |                      |

|                       |              |                                |                                       |   |    |
|-----------------------|--------------|--------------------------------|---------------------------------------|---|----|
| MMU<br><i>Rpl6</i>    | Forward      | ATTAAAATAGTTGGTGGGGATAAGA      | MMU<br>chr5:121,205,796 – 121,205,886 |   | 60 |
|                       | Reverse      | *CCCCAAAAAACAACCCAAACT         |                                       |   |    |
|                       | Sequencing   | GTTGGTGGGGATAAGAA              |                                       | 3 |    |
|                       |              |                                |                                       |   |    |
| <b>Bovine ageDMRs</b> |              |                                |                                       |   |    |
| BTA<br><i>CHD7</i>    | Forward      | GGGTAGGGTTATTTTTTATATTTGT      | BTA<br>chr14: 26,361,213 – 26,361,349 |   | 58 |
|                       | Reverse      | *TTTCCCTAACTCAAACCCTCTTA       |                                       |   |    |
|                       | Sequencing 1 | GGTTATTTTTTATATTTGTAGTAGT      |                                       | 3 |    |
|                       | Sequencing 2 | GTAGTATGGTTAGTTATAGT           |                                       | 2 |    |
| HSA<br><i>CHD7</i>    | Forward      | GGTTTATTTTTTGTGTGGTTGATTAT     | HSA<br>chr8: 60,741,869 – 60,742,066  |   | 60 |
|                       | Reverse      | *ACCCCAAACCTATTCAAATACCA       |                                       |   |    |
|                       | Sequencing 1 | ATGTTGTTGTATGGAAAAATT          |                                       | 1 |    |
|                       | Sequencing 2 | GGTTTGTGTAGGGG                 |                                       | 5 |    |
| MMU<br><i>Chd7</i>    | Forward      | ATGTAGTAGATGGGTAGTTATTTGG      | MMU<br>chr4: 8,752,042 – 8,752,156    |   | 60 |
|                       | Reverse      | *TTCCCTAACTAAAACCCTCTTAACCTTAA |                                       |   |    |
|                       | Sequencing   | AGATGGGTAGTTATTTGGTA           |                                       | 2 |    |
|                       |              |                                |                                       |   |    |
| BTA<br><i>HDAC11</i>  | Forward      | TGGGTTGTAGGGAGTAGAT            | BTA<br>chr22: 58,440,562 – 58,440,749 |   | 58 |
|                       | Reverse      | *CCAACCCAACCTATACCAACA         |                                       |   |    |
|                       | Sequencing 1 | GTTGTAGGGAGTAGATGTA            |                                       | 2 |    |
|                       | Sequencing 2 | GAGGTTGATTATTTTGTTTTATT        |                                       | 2 |    |
|                       | Sequencing 3 | GGTTTAGGAAGGTTATGTT            |                                       | 7 |    |
| HSA<br><i>HDAC11</i>  | Forward      | GGGGGATTTTTTATATTTTTTTAGGAAATT | HSA<br>chr3: 13,481,257 – 13,481,410  |   | 58 |
|                       | Reverse      | *CCCAACTATACCAACATATACCAAAAACA |                                       |   |    |
|                       | Sequencing 1 | AAATTGATTATTTTGTTTTATTT        |                                       | 1 |    |
|                       | Sequencing 2 | GTTTATGAAGGTGATGTTGTA          |                                       | 5 |    |
|                       |              |                                |                                       |   |    |

|                      |              |                               |                                       |   |    |
|----------------------|--------------|-------------------------------|---------------------------------------|---|----|
| BTA<br><i>PAK1</i>   | Forward      | ATGTTTTAGGGTGGGTTAGTATTAT     | BTA<br>chr29: 18,586,469 – 18,586,712 |   | 60 |
|                      | Reverse      | *CAACCCCAAACTAAACCTTTACT      |                                       |   |    |
|                      | Sequencing 1 | GGGTGGGTTAGTATTATT            |                                       | 6 |    |
|                      | Sequencing 2 | GATATTTAGGTTTTATT             |                                       | 5 |    |
| HSA<br><i>PAK1</i>   | Forward      | GGTATTATTTGGTGGGGAAGGTTAG     | HSA<br>chr11: 77,411,766 – 77,411,908 |   | 62 |
|                      | Reverse      | *CCAAAAACCCAACCCAATAAATC      |                                       |   |    |
|                      | Sequencing 1 | GGGGAAGGTTAGTTT               |                                       | 5 |    |
|                      | Sequencing 2 | GGGTATTTATAAGGTTTTTGTTTT      |                                       | 3 |    |
| MMU<br><i>Pak1</i>   | Forward      | TTTAAATTGTTGAGTAGGGAGAGG      | MMU<br>chr7: 97,843,057 – 97,843,195  |   | 60 |
|                      | Reverse      | *TTCTACCCCAACTCTCAATCTAACTATA |                                       |   |    |
|                      | Sequencing   | TGAGTAGGGAGAGGT               |                                       | 2 |    |
|                      |              |                               |                                       |   |    |
| BTA<br><i>PTK2B</i>  | Forward      | GGGTTTTGGGGGGTTTTTA           | BTA<br>chr8: 74,490,878 – 74,491,040  |   | 60 |
|                      | Reverse      | *AAATAAACTCACACCCATCATTTTC    |                                       |   |    |
|                      | Sequencing 1 | GGGGGGTTTTTAGGT               |                                       | 3 |    |
|                      | Sequencing 2 | GGTTAGGGTTTTAGATA             |                                       | 3 |    |
|                      | Sequencing 3 | GGTTAGGATTAGTATAT             |                                       | 2 |    |
| HSA<br><i>PTK2B</i>  | Forward      | TTTGGGGTTATGAGGTATGTG         | HSA<br>chr8: 27,397,480 – 27,397,678  |   | 60 |
|                      | Reverse      | *CTACTAATACCACCACCATAACTCTA   |                                       |   |    |
|                      | Sequencing 1 | GTTGTTTTTGTAGGATTGTAAT        |                                       | 1 |    |
|                      | Sequencing 2 | GGATGTTTGGGGTGT               |                                       | 5 |    |
|                      |              |                               |                                       |   |    |
|                      |              |                               |                                       |   |    |
| <b>Mouse ageDMRs</b> |              |                               |                                       |   |    |
| MMU<br><i>Def6</i>   | Forward      | AGTTTTTTGGTTAAGGTTTGATT       | MMU<br>chr17: 28,216,907 – 28,217,114 |   | 58 |
|                      | Reverse      | *ACTCCTCACCTTATCTAAAATATACTT  |                                       |   |    |
|                      | Sequencing   | ATATTGTTTTGAATATTTTTTATG      |                                       | 4 |    |

|                                |            |                                |                                        |   |    |
|--------------------------------|------------|--------------------------------|----------------------------------------|---|----|
| HSA<br><i>DEF6</i>             | Forward    | GGTAGGGTATGTATTTTTGGTTGGATAT   | HSA<br>chr6: 35,309,647 – 35,309,787   |   | 62 |
|                                | Reverse    | *ACTACCACTCTACTCTATCCCAAATACT  |                                        |   |    |
|                                | Sequencing | TTGGTTGGATATAGGG               |                                        | 4 |    |
| BTA<br><i>DEF6</i>             | Forward    | ATGTATTTGTTGAGGTAGGGTATGT      | BTA<br>chr23: 9,282,311 – 9,282,446    |   | 60 |
|                                | Reverse    | *CTCAAATACTATCCCAACCT          |                                        |   |    |
|                                | Sequencing | GGTATGTATTTTTGGTTGG            |                                        | 6 |    |
|                                |            |                                |                                        |   |    |
| MMU<br><i>Nrxn2</i><br>assay1  | Forward    | *GGGGTTTATTTTGGGGTTGAG         | MMU<br>chr19: 6,504,071 – 6,504,151    |   | 58 |
|                                | Reverse    | CCCACCCTCTCTCCTCTT             |                                        |   |    |
|                                | Sequencing | CCCTCTCTCCTCTTC                |                                        | 4 |    |
| MMU<br><i>Nrxn2</i><br>assay 2 | Forward    | ATAGAGAGGGATGTAGGTAAGG         | MMU<br>chr19: 6,503,948 – 6,504,228    |   | 58 |
|                                | Reverse    | *TCTAATCCTTCAAACTCCCAACAAAAC   |                                        |   |    |
|                                | Sequencing | GGGTGTTAGGTTTTTA               |                                        | 4 |    |
| HSA<br><i>NRXN2</i>            | Forward    | TGGGGTTTATTTTGGGGTTGAG         | HSA<br>chr11: 64,636,266 – 64,636,354  |   | 60 |
|                                | Reverse    | *TCTCTCCCCTTCTCCTTCTCTT        |                                        |   |    |
|                                | Sequencing | ATTTTGGGGTTGAGAT               |                                        | 4 |    |
| BTA<br><i>NRXN2</i>            | Forward    | GGGGTTTATTTTGGGGTTGAG          | BTA<br>chr29: 42,885,053 – 42,885,133  |   | 58 |
|                                | Reverse    | *CCCCTCTATCTCCTCTTACCAT        |                                        |   |    |
|                                | Sequencing | ATTTTGGGGTTGAGAT               |                                        | 4 |    |
|                                |            |                                |                                        |   |    |
| MMU<br><i>Tbx19</i>            | Forward    | *TGAATGTAGATATAGTTGTGGTTAGAGAT | MMU<br>chr1: 165,153,556 – 165,153,692 |   | 60 |
|                                | Reverse    | AAACTAAACCCCAATACTATATACTCTCT  |                                        |   |    |
|                                | Sequencing | ACTCTCTCCTACTAAACT             |                                        | 6 |    |
| HSA<br><i>TBX19</i>            | Forward    | *ATGGGAGTTTTTATTTAGTGGGTTTTA   | HSA<br>chr1: 168,291,215 – 168,291,375 |   | 58 |
|                                | Reverse    | TACTCCCTCCTACTAACTTTATCC       |                                        |   |    |
|                                | Sequencing | CCTACTAACTTTATCCCT             |                                        | 5 |    |
|                                |            |                                |                                        |   |    |



|                     |            |                             |                                |   |    |
|---------------------|------------|-----------------------------|--------------------------------|---|----|
| BTA<br><i>TBX19</i> | Forward    | *TTGGGTGGATGTAGATATAGTTG    | BTA<br>chr3: 253,001 – 253,132 |   | 60 |
|                     | Reverse    | CCAATACCATATACTCACTCCTTCTAA |                                |   |    |
|                     | Sequencing | CCTTCTAAACTTTATCCCA         |                                | 3 |    |

<sup>a</sup> Primers indicated by a star are biotinylated at the 5' end.

<sup>b</sup> Genome Reference Consortium Human Build 38 (GRCh38)/hg38, ARS-UCD1.2/bosTau9, and Genome Reference Consortium Mouse Build 38 (GRCm38)/mm10 were used as references.

**Table S3.** Correlation between single CpG methylation and donor age in human, bovine, and mouse sperm.

CpGs which are conserved between species are highlighted in different colours.

### Human ageDMRs

|                         | Human        |              |              | Mouse       |             |             |             |
|-------------------------|--------------|--------------|--------------|-------------|-------------|-------------|-------------|
| NFKB2 assay             | 1            |              |              | 1           |             |             |             |
| CpG                     | 1            | 2            | 3            | 1           | 2           | 3           | 4           |
| Genomic location        | 10:102398797 | 10:102398839 | 10:102398848 | 19:46308688 | 19:46308693 | 19:46308726 | 19:46308744 |
| Correlation coefficient | -0.48        | -0.25        | -0.40        | 0.14        | 0.19        | 0.15        | 0.15        |
| p value                 | 0.00         | 0.07         | 0.01         | 0.20        | 0.07        | 0.16        | 0.15        |

|                         | Human       |             |             | Mouse       |             |
|-------------------------|-------------|-------------|-------------|-------------|-------------|
| RASGEF1C assay          | 1           |             |             | 1           |             |
| CpG                     | 1           | 2           | 3           | 1           | 2           |
| Genomic location        | 5:180128402 | 5:180128418 | 5:180128451 | 11:49960567 | 11:49960589 |
| Correlation coefficient | -0.31       | -0.32       | -0.30       | -0.04       | -0.19       |
| p value                 | 0.01        | 0.01        | 0.04        | 0.74        | 0.06        |

|                         | Human        |              |              |              | Bovine      |             | Mouse       |             |             |
|-------------------------|--------------|--------------|--------------|--------------|-------------|-------------|-------------|-------------|-------------|
| RPL6 assay              | 1            |              |              |              | 1           |             | 1           |             |             |
| CpG                     | 1            | 2            | 3            | 4            | 1           | 2           | 1           | 2           | 3           |
| Genomic location        | 12:112408272 | 12:112408269 | 12:112408262 | 12:112408247 | 17:61838784 | 17:61838769 | 5:121205822 | 5:121205832 | 5:121205847 |
| Correlation coefficient | -0.25        | -0.25        | -0.24        | -0.26        | 0.22        | 0.30        | -0.01       | -0.09       | 0.14        |
| p value                 | 0.05         | 0.05         | 0.06         | 0.04         | 0.19        | 0.08        | 0.92        | 0.39        | 0.19        |

Bovine ageDMRs

|                         | Bovine      |             |             |             |             |            |           |           |
|-------------------------|-------------|-------------|-------------|-------------|-------------|------------|-----------|-----------|
| CHD7 assay              | 1           |             |             | 2           |             |            |           |           |
| CpG                     | 1           | 2           | 3           | 1           | 2           |            |           |           |
| Genomic location        | 14:26361248 | 14:26361261 | 14:26361280 | 14:26361301 | 14:26361322 |            |           |           |
| Correlation coefficient | 0.74        | 0.75        | 0.76        | 0.73        | 0.79        |            |           |           |
| p value                 | 0.00        | 0.00        | 0.00        | 0.00        | 0.00        |            |           |           |
|                         | Human       |             |             |             |             |            | Mouse     |           |
|                         | 1           | 2           |             |             |             |            | 1         |           |
|                         | 1           | 1           | 2           | 3           | 4           | 5          | 1         | 2         |
|                         | 8:60742015  | 8:60741956  | 8:60741953  | 8:60741947  | 8:60741941  | 8:60741932 | 4:8752069 | 4:8752095 |
|                         | -0.01       | 0.23        | -0.10       | 0.05        | -0.09       | -0.04      | 0.08      | 0.04      |
|                         | 0.94        | 0.07        | 0.43        | 0.69        | 0.48        | 0.73       | 0.42      | 0.74      |

|                         | Bovine      |             |             |             |             |             |             |             |             |             |             |
|-------------------------|-------------|-------------|-------------|-------------|-------------|-------------|-------------|-------------|-------------|-------------|-------------|
| HDAC11 assay            | 1           |             | 2           |             | 3           |             |             |             |             |             |             |
| CpG                     | 1           | 2           | 1           | 2           | 1           | 2           | 3           | 4           | 5           | 6           | 7           |
| Genomic location        | 22:58440588 | 22:58440593 | 22:58440641 | 22:58440644 | 22:58440691 | 22:58440693 | 22:58440696 | 22:58440704 | 22:58440715 | 22:58440717 | 22:58440723 |
| Correlation coefficient | 0.12        | 0.19        | 0.25        | 0.52        | 0.27        | 0.17        | 0.27        | 0.37        | 0.36        | 0.25        | 0.30        |
| p value                 | 0.49        | 0.26        | 0.14        | 0.00        | 0.13        | 0.34        | 0.13        | 0.03        | 0.04        | 0.16        | 0.08        |
|                         | Human       |             |             |             |             |             |             |             |             |             |             |
|                         | 1           | 2           |             |             |             |             |             |             |             |             |             |
|                         | 1           | 1           | 2           | 3           | 4           | 5           |             |             |             |             |             |
|                         | 3:13481360  | 3:13481310  | 3:13481308  | 3:13481305  | 3:13481297  | 3:13481286  |             |             |             |             |             |
|                         | -0.19       | -0.10       | -0.24       | -0.31       | -0.05       | -0.11       |             |             |             |             |             |
|                         | 0.13        | 0.41        | 0.05        | 0.01        | 0.69        | 0.41        |             |             |             |             |             |

|                         | Bovine      |             |             |             |             |             |             |             |             |             |             |
|-------------------------|-------------|-------------|-------------|-------------|-------------|-------------|-------------|-------------|-------------|-------------|-------------|
| PAK1 assay              | 1           |             |             |             |             |             | 2           |             |             |             |             |
| CpG                     | 1           | 2           | 3           | 4           | 5           | 6           | 1           | 2           | 3           | 4           | 5           |
| Genomic location        | 29:18586681 | 29:18586672 | 29:18586666 | 29:18586651 | 29:18586641 | 29:18586633 | 29:18586586 | 29:18586562 | 29:18586556 | 29:18586542 | 29:18586538 |
| Correlation coefficient | 0.59        | 0.57        | 0.55        | 0.67        | 0.64        | 0.57        | 0.60        | 0.60        | 0.61        | 0.65        | 0.68        |
| p value                 | 0.00        | 0.00        | 0.00        | 0.00        | 0.00        | 0.00        | 0.00        | 0.00        | 0.00        | 0.00        | 0.00        |
|                         | Human       |             |             |             |             |             |             |             | Mouse       |             |             |
|                         | 1           |             |             |             |             | 2           |             |             | 1           |             |             |
|                         | 1           | 2           | 3           | 4           | 5           | 1           | 2           | 3           | 1           | 2           |             |
|                         | 11:77411794 | 11:77411806 | 11:77411816 | 11:77411819 | 11:77411827 | 11:77411847 | 11:77411880 | 11:77411884 | 7:97843083  | 7:97843091  |             |
|                         | -0.04       | -0.07       | -0.04       | -0.17       | -0.16       | 0.13        | 0.04        | 0.06        | 0.01        | -0.09       |             |
|                         | 0.76        | 0.59        | 0.78        | 0.17        | 0.20        | 0.30        | 0.76        | 0.65        | 0.94        | 0.37        |             |

|                         | Bovine     |            |            |            |            |            |            |            |  |
|-------------------------|------------|------------|------------|------------|------------|------------|------------|------------|--|
| PTK2B assay             | 1          |            |            | 2          |            |            | 3          |            |  |
| CpG                     | 1          | 2          | 3          | 1          | 2          | 3          | 1          | 2          |  |
| Genomic location        | 8:74491017 | 8:74491014 | 8:74490993 | 8:74490971 | 8:74490955 | 8:74490952 | 8:74490934 | 8:74490924 |  |
| Correlation coefficient | 0.52       | .370*      | 0.25       | 0.33       | 0.32       | 0.38       | 0.57       | 0.56       |  |
| p value                 | 0.00       | 0.03       | 0.15       | 0.05       | 0.06       | 0.02       | 0.00       | 0.00       |  |
|                         | Human      |            |            |            |            |            |            |            |  |
|                         | 1          | 2          |            |            |            |            |            |            |  |
|                         | 1          | 1          | 2          | 3          | 4          | 5          |            |            |  |
|                         | 8:27397561 | 8:27397599 | 8:27397612 | 8:27397628 | 8:27397633 | 8:27397636 |            |            |  |
|                         | -0.05      | 0.08       | -0.09      | -0.08      | -0.11      | -0.07      |            |            |  |
|                         | 0.71       | 0.56       | 0.50       | 0.62       | 0.47       | 0.66       |            |            |  |

Mouse ageDMRs

| DEF6 assay              | Mouse       |             |             |             | Human      |            |            |            |
|-------------------------|-------------|-------------|-------------|-------------|------------|------------|------------|------------|
|                         | 1           |             |             |             | 1          |            |            |            |
| CpG                     | 1           | 2           | 3           | 4           | 1          | 2          | 3          | 4          |
| Genomic location        | 17:28217012 | 17:28217034 | 17:28217042 | 17:28217053 | 6:35309753 | 6:35309739 | 6:35309717 | 6:35309692 |
| Correlation coefficient | -0.69       | -0.73       | -0.73       | -0.55       | -0.04      | 0.11       | 0.21       | -0.15      |
| p value                 | 0.00        | 0.00        | 0.00        | 0.00        | 0.77       | 0.38       | 0.10       | 0.51       |
|                         | Bovine      |             |             |             |            |            |            |            |
|                         | 1           |             |             |             |            |            |            |            |
|                         | 1           | 2           | 3           | 4           | 5          | 6          |            |            |
|                         | 23:9282405  | 23:9282396  | 23:9282390  | 23:9282385  | 23:9282363 | 23:9282339 |            |            |
|                         | 0.01        |             | 0.29        | 0.49        | -0.01      | 0.19       |            |            |
|                         | 0.96        |             | 0.09        | 0.00        | 0.95       | 0.33       |            |            |

| NRXN2 assay             | Mouse       |             |             |             |             |             |             |             |
|-------------------------|-------------|-------------|-------------|-------------|-------------|-------------|-------------|-------------|
|                         | 1           |             |             |             | 2           |             |             |             |
| CpG                     | 1           | 2           | 3           | 4           | 1           | 2           | 3           | 4           |
| Genomic location        | 19:6504132  | 19:6504125  | 19:6504118  | 19:6504112  | 19:6504094  | 19:6504063  | 19:6504046  | 19:6503984  |
| Correlation coefficient | -0.25       | -0.46       | -0.74       | -0.58       | -0.94       | -0.82       | -0.52       | -0.82       |
| p value                 | 0.02        | 0.00        | 0.00        | 0.00        | 0.00        | 0.00        | 0.00        | 0.00        |
|                         | Human       |             |             |             | Bovine      |             |             |             |
|                         | 1           |             |             |             | 1           |             |             |             |
|                         | 1           | 2           | 3           | 4           | 1           | 2           | 3           | 4           |
|                         | 11:64636329 | 11:64636311 | 11:64636298 | 11:64636291 | 29:42885109 | 29:42885090 | 29:42885084 | 29:42885077 |
|                         | -0.47       | 0.03        | -0.07       | -0.12       | -0.12       | -0.14       | 0.06        | -0.05       |
|                         | 0.00        | 0.81        | 0.58        | 0.37        | 0.50        | 0.42        | 0.74        | 0.78        |

| TBX19 assay             | Mouse       |             |             |             |             |             |          |          |
|-------------------------|-------------|-------------|-------------|-------------|-------------|-------------|----------|----------|
|                         | 1           |             |             |             |             |             |          |          |
| CpG                     | 1           | 2           | 3           | 4           | 5           | 6           |          |          |
| Genomic location        | 1:165153650 | 1:165153646 | 1:165153641 | 1:165153631 | 1:165153620 | 1:165153599 |          |          |
| Correlation coefficient | -0.30       | -0.35       | -0.31       | -0.29       | -0.35       | -0.28       |          |          |
| p value                 | 0.00        | 0.00        | 0.00        | 0.01        | 0.00        | 0.01        |          |          |
|                         | Human       |             |             |             |             | Bovine      |          |          |
|                         | 1           |             |             |             |             | 1           |          |          |
|                         | 1           | 2           | 3           | 4           | 5           | 1           | 2        | 3        |
|                         | 1:168291243 | 1:168291254 | 1:168291265 | 1:168291271 | 1:168291286 | 3:253092    | 3:253081 | 3:253070 |
|                         | 0.04        | -0.03       | -0.09       | 0.08        | -0.20       | 0.39        | 0.45     | 0.24     |
|                         | 0.75        | 0.82        | 0.49        | 0.53        | 0.12        | 0.02        | 0.01     | 0.16     |
